# Supplementary material
Source: PubMed Central journal article supplement (PMC5937130)
Supplement: NIHMS961243-supplement-Supp.pdf [file NIHMS961243-supplement-Supp.pdf]

February 4, 2018

**Data Processing, Pathway Mapping Multi-Omic Systems and Activity Analysis using  
XCMS Online  
Supplementary Methods**

Erica M. Forsberg<sup>1,2</sup>, Tao Huan<sup>1</sup>, Duane Rinehart<sup>1</sup>, H. Paul Benton<sup>1</sup>, Benedikt Warth<sup>1,3</sup>, Brian Hilmers<sup>1</sup>, Gary Siuzdak<sup>1\*</sup>

<sup>1</sup>Center for Metabolomics and Mass Spectrometry, The Scripps Research Institute, La Jolla, CA, 92037, United States

<sup>2</sup>Department of Chemistry and Biochemistry, San Diego State University, San Diego, CA, 92182, United States

<sup>3</sup>Department of Food Chemistry and Toxicology, University of Vienna, 1090 Vienna, Austria

\*Author to whom correspondence should be addressed:

Gary Siuzdak  
Tel: (858) 784-9415  
E-mail: [siuzdak@scripps.edu](mailto:siuzdak@scripps.edu)  
Internet: <https://masspec.scripps.edu/>

**Demonstration Dataset Experimental Design:**

To test the efficacy of the multi-omic platform, a standard method for probing changes in metabolomics was developed using *E. coli* K12 MG1655 cultures grown in different carbon sources (glucose and adenosine carbon sources). Concurrently with metabolomic data acquisition, RNA transcriptomic data was generated on the same sample set and a set of literature-generated proteomic data<sup>1-3</sup> was acquired. This data was run using the base parameter set “HPLC / UHD QTOF (HILIC, neg)” with none of the settings altered, with the exception of the “identification tab”, where it was necessary to change the biosource selection to *E. coli* K12 MG1655, with pathway prediction settings of 20 ppm mass tolerance and a 5,000 signal intensity threshold to account for

the expected error in the raw data. This was saved as a new parameter set called “Demo HPLC / UHD QTOF (HILIC, neg)”.

### ***E. coli* Growth Methods.**

Glucose and adenosine were prepared with equimolar concentrations of carbon in 10 mL aliquots of M9 minimal media in triplicate. Carbon concentration was based on a final concentration of 20 mM glucose or 0.12 M carbon. All carbon sources were prepared in sterile water, then filtered through a 0.22  $\mu\text{m}$  syringe filter prior to addition to M9 salts. A 10 mL culture of *E. coli* was grown in LB media overnight at 37°C. To inoculate each condition, which was prepared in triplicate, a 1 mL aliquot of cells was centrifuged at 13,000 rpm for 1 minute, the supernatant media was removed and the pellet was washed 3X with sterile water. The cells were made up to a final volume of 1 mL in sterile water and a 1  $\mu\text{L}$  aliquot was added to 8 mL of each carbon source. The cultures were grown until an  $\text{OD}_{600} \sim 1$ , or stopped after 72 hours if the growth rate was plateaued. Triplicate 1 mL aliquots were taken for each replicate for metabolomics analysis and duplicate 1 mL samples were taken for RNA sequencing.

### ***E. coli* RNA extraction and mRNA-seq.**

RNA in *E. coli* samples were extracted using RNeasy Mini Kit (50, Cat. No. 74104) and the extraction procedures followed the protocols inside the extraction kit. In brief, cells were lysed with the working solution and then centrifuged. The supernatants were loaded onto spin column and spun down multiple times to purify RNAs. RNA-seq experiment was performed with 75 bp reads generated on the NextSeq Analyzer located at the Scripps DNA Sequencing Facility. The Genome Analyzer Pipeline Software (currently bcl2fastq/2.16.0.10) is used to perform the early data analysis of a sequencing run, which does the image analysis, base calling, and demultiplexing. Cutadapt software<sup>19</sup> was used to trim the adapter and low base-pair called scores. For mRNA-Seq, STAR 2.3.0 was used to align to genome using the *E. coli* K12 genome reference. EdgeR as used with the method finds number of Differentially Expressed transcripts (DE) significantly changed for the comparisons of different carbon sources. The results are first filtered with False Discovery Rate (FDR)  $>0.15$  and then by log

Counts Per Million ( $\log_2(\text{CPM})$ ) > 1.0. The  $\log_2$  counts-per-million ( $\log_2$  CPM) cut-off used to avoid undefined values and the poorly defined log-fold-changes for low counts shrunk towards zero. Further the deviation of the normalized counts within groups can be used to filter out the transcripts with higher variance. We noted that almost all the transcripts were significantly up or down changed.

### ***E. coli* metabolome extraction and LC-MS based metabolomic profiling.**

For metabolomics, each sample was spun down at 14,000xg for 5 min at 4°C. The supernatant was removed and 1.0 mL of ice cold 2:2:1 v/v acetonitrile/methanol/water was added to each tube and vortexed. Cell lysis was performed by three freeze/thaw cycles in liquid nitrogen room temperature. Samples were sonicated and then placed in –20°C overnight to allow protein and cell debris to precipitate. The samples were centrifuged again, supernatant was transferred to glass vials and evaporated at 8°C to dryness. The dry extracts were then reconstituted in 100  $\mu\text{L}$  of acetonitrile:water (1:1, v/v), sonicated for 10 min and centrifuged for 15 min at 13,000 rpm and 4°C to remove insoluble debris. The supernatants were transferred to HPLC vials and stored at –80°C prior to LC-MS analysis.

The LC-MS analysis was performed on each sample in triplicate using a Bruker Impact QTOF mass spectrometer (Billerica, MA, USA) linked to an Agilent 1200 series capillary HPLC system (Palo Alto, CA, USA). 2  $\mu\text{L}$  sample was injected after injection volume optimization. A Phenomenex Luna NH<sub>2</sub> column (1 mm  $\times$  15 cm, 3  $\mu\text{m}$  particle size, 100 Å pore size) was used for LC separation. Mobile phase A was 20 mM ammonium acetate in H<sub>2</sub>O with 5% acetonitrile (ACN), and mobile phase B was ACN with 5% H<sub>2</sub>O. The gradient elution profile was as follows: t = 0 min, 95%B; t = 5 min, 95%B; t = 50 min, 5%B. t = 63min, 5%B. The flow rate was 50  $\mu\text{L}/\text{min}$ . 20 min post acquisition time was also added with 95%B to re-equilibrium the LC column. Injection of 1  $\mu\text{L}$  sodium formate (250  $\mu\text{M}$ ) occurred at t = 57 min and eluted on t = 61min. This calibration peak was used to internally calibrate the LC-MS data and also served as the MS peak intensity quality control. The m/z scan range was 25–1500, ionization was in negative mode and acquisition speed was 2 Hz. All data files were converted to mzXML format and uploaded to XCMS Online to perform a pairwise analysis on glucose control

( $n = 3$ ) versus adenosine stressed ( $n = 3$ ) using Welch's t-test. For parameter settings to run XCMS job and perform automated pathway analysis, see **Supplemental Table S1**.

**Supplementary Table S1.** Parameter settings for *E. coli* experimental data analysis

|   |                                                                                                                                                                                                                                                                                                                                                                                                                                                                                                                                                                                                                                                                                                                                                                                                                                                                                                                                                                                                                                                                                                                                                                                                                                                                                                                                                                                                                                                                                                                                                                                                                                                                                                                                                                                                                                                                                                                                                                                                                                                |
|---|------------------------------------------------------------------------------------------------------------------------------------------------------------------------------------------------------------------------------------------------------------------------------------------------------------------------------------------------------------------------------------------------------------------------------------------------------------------------------------------------------------------------------------------------------------------------------------------------------------------------------------------------------------------------------------------------------------------------------------------------------------------------------------------------------------------------------------------------------------------------------------------------------------------------------------------------------------------------------------------------------------------------------------------------------------------------------------------------------------------------------------------------------------------------------------------------------------------------------------------------------------------------------------------------------------------------------------------------------------------------------------------------------------------------------------------------------------------------------------------------------------------------------------------------------------------------------------------------------------------------------------------------------------------------------------------------------------------------------------------------------------------------------------------------------------------------------------------------------------------------------------------------------------------------------------------------------------------------------------------------------------------------------------------------|
| 1 | <p>General Feature Detection Retention Time Correction Alignment Statistics Annotation Identification Visualization Miscellaneous</p> <p>Option Value Note:</p> <p>Name Demo HPLC / UHD QTOF (HILIC, neg)</p> <p>Comment Based on: param #6674</p> <p>Retention time format <input type="text" value="minutes"/> show the retention times in results tables and figures in minutes or seconds</p> <p>Polarity <input type="text" value="negative"/> data acquired in positive or negative mode ?</p> <p><input type="button" value="Close"/></p>                                                                                                                                                                                                                                                                                                                                                                                                                                                                                                                                                                                                                                                                                                                                                                                                                                                                                                                                                                                                                                                                                                                                                                                                                                                                                                                                                                                                                                                                                               |
| 2 | <p>General Feature Detection Retention Time Correction Alignment Statistics Annotation Identification Visualization Miscellaneous</p> <p>Method: <input type="text" value="centWave"/></p> <p>Option Value Note:</p> <p>ppm <input type="text" value="15"/> maximal tolerated m/z deviation in consecutive scans, in ppm (parts per million)</p> <p>minimum peak width <input type="text" value="10"/> minimum chromatographic peak width in seconds<br/>note: must be less than max peak width. See also <a href="#">here</a>.</p> <p>maximum peak width <input type="text" value="120"/> maximum chromatographic peak width in seconds<br/>note: must be greater than min peak width. See also <a href="#">here</a>.</p> <p><a href="#">View Advanced Options</a></p> <p>mzdiff <input type="text" value="0.01"/> minimum difference in m/z for peaks with overlapping retention times, can be negative to allow overlap</p> <p>Signal/Noise threshold <input type="text" value="6"/> Signal/Noise threshold</p> <p>Integration method <input type="text" value="1"/> Integration method. If =1 peak limits are found through descent on the mexican hat filtered data, if =2 the descent is done on the real data. Method 2 is very accurate but prone to noise, while method 1 is more robust to noise but less exact.</p> <p>prefilter peaks <input type="text" value="3"/> Prefilter step for the first phase. Mass traces are only retained if they contain at least [prefilter peaks] peaks with intensity &gt;= [prefilter intensity]</p> <p>prefilter intensity <input type="text" value="100"/> Prefilter step for the first phase. Mass traces are only retained if they contain at least [prefilter peaks] peaks with intensity &gt;= [prefilter intensity]</p> <p>Noise Filter <input type="text" value="0"/> optional argument which is useful for data that was centroided without any intensity threshold, centroids with intensity &lt; noise are omitted from ROI detection</p> <p><input type="button" value="Close"/></p> |
| 3 | <p>General Feature Detection Retention Time Correction Alignment Statistics Annotation Identification Visualization Miscellaneous</p> <p>Method: <input type="text" value="obiwarp"/></p> <p>Option Value Note:</p> <p>profStep <input type="text" value="1"/> step size (in m/z) to use for profile generation from the raw data files</p> <p><input type="button" value="Close"/></p>                                                                                                                                                                                                                                                                                                                                                                                                                                                                                                                                                                                                                                                                                                                                                                                                                                                                                                                                                                                                                                                                                                                                                                                                                                                                                                                                                                                                                                                                                                                                                                                                                                                        |
| 4 | <p>General Feature Detection Retention Time Correction Alignment Statistics Annotation Identification Visualization Miscellaneous</p> <p>Option Value Note:</p> <p>bw <input type="text" value="5"/> Allowable retention time deviations, in seconds. In more detail: bandwidth (standard deviation or half width at half maximum) of gaussian smoothing kernel to apply to the peak density chromatogram</p> <p>minfrac <input type="text" value="0.5"/> minimum fraction of samples necessary in at least one of the sample groups for it to be a valid group</p> <p>mzwid <input type="text" value="0.015"/> width of overlapping m/z slices to use for creating peak density chromatograms and grouping peaks across samples</p> <p><a href="#">View Advanced Options</a></p> <p>minsamp <input type="text" value="1"/> minimum number of samples necessary in at least one of the sample groups for it to be a valid group</p> <p>max <input type="text" value="100"/> maximum number of groups to identify in a single m/z slice</p> <p><input type="button" value="Close"/></p>                                                                                                                                                                                                                                                                                                                                                                                                                                                                                                                                                                                                                                                                                                                                                                                                                                                                                                                                                         |

| 5                                                                    | <div style="display: flex; justify-content: space-between; border-bottom: 1px solid black; padding-bottom: 5px;"> <span>General</span> <span>Feature Detection</span> <span>Retention Time Correction</span> <span>Alignment</span> <span>Statistics</span> <span>Annotation</span> <span>Identification</span> <span>Visualization</span> <span>Miscellaneous</span> </div> <table style="width: 100%; border-collapse: collapse;"> <thead> <tr> <th style="width: 30%; text-align: left;">Option</th> <th style="width: 40%; text-align: left;">Value</th> <th style="width: 30%; text-align: left;">Note:</th> </tr> </thead> <tbody> <tr> <td>Statistical test</td> <td>Unpaired parametric t-test (Welch t-test)</td> <td>Statistical test method: Welch t-test (unequal variances) or Wilcoxon Rank Sum test</td> </tr> <tr> <td>Perform paired test</td> <td><span style="background-color: #28a745; color: white; padding: 2px 5px;">VIEW PAIRS</span></td> <td>The selected statistical test is performed as a paired test. The sample pairs need to be specified.</td> </tr> <tr> <td>Perform post-hoc analysis</td> <td>True</td> <td>Perform post-hoc analysis [multigroup only]</td> </tr> <tr> <td>p-value threshold (highly significant features)</td> <td>0.01</td> <td>Features with a p-value less than this threshold are considered highly significant. Some statistical figures (e.g. Mirror plot) are generated using only the dysregulated features according to this threshold.</td> </tr> <tr> <td>fold change threshold (highly significant features)</td> <td>1.5</td> <td>Features with a fold change greater than this threshold are considered highly significant. Some statistical figures (e.g. Mirror plot) are generated using only the dysregulated features according to this threshold.</td> </tr> <tr> <td>p-value threshold (significant features)</td> <td>0.05</td> <td>Features with a p-value less than this threshold are not considered significant and are omitted from some calculations to save time and space. EIC's, annotations and database ID's are not generated for features with p-values above this threshold.</td> </tr> <tr> <td colspan="3"><a href="#">View Advanced Options</a></td> </tr> <tr> <td>value</td> <td>into</td> <td>intensity values to be used for the diffreport. If value="into", integrated peak intensities are used. If value="maxo", maximum peak intensities are used.</td> </tr> <tr> <td>Normalization</td> <td>None</td> <td>Normalize the intensity values by either probabilistic quotient or cyclic loess normalization.</td> </tr> <tr> <td colspan="3" style="text-align: right;"><span style="border: 1px solid #ccc; padding: 2px 5px;">Close</span></td> </tr> </tbody> </table> | Option                                                                                                                                                                                                                                                 | Value | Note: | Statistical test | Unpaired parametric t-test (Welch t-test) | Statistical test method: Welch t-test (unequal variances) or Wilcoxon Rank Sum test | Perform paired test                                                  | <span style="background-color: #28a745; color: white; padding: 2px 5px;">VIEW PAIRS</span>                                                                                                                               | The selected statistical test is performed as a paired test. The sample pairs need to be specified. | Perform post-hoc analysis | True                                                                                                                                                                                           | Perform post-hoc analysis [multigroup only]                                                                                                                                                                                  | p-value threshold (highly significant features)                      | 0.01 | Features with a p-value less than this threshold are considered highly significant. Some statistical figures (e.g. Mirror plot) are generated using only the dysregulated features according to this threshold. | fold change threshold (highly significant features) | 1.5  | Features with a fold change greater than this threshold are considered highly significant. Some statistical figures (e.g. Mirror plot) are generated using only the dysregulated features according to this threshold. | p-value threshold (significant features) | 0.05 | Features with a p-value less than this threshold are not considered significant and are omitted from some calculations to save time and space. EIC's, annotations and database ID's are not generated for features with p-values above this threshold. | <a href="#">View Advanced Options</a>                                |  |  | value | into | intensity values to be used for the diffreport. If value="into", integrated peak intensities are used. If value="maxo", maximum peak intensities are used. | Normalization | None | Normalize the intensity values by either probabilistic quotient or cyclic loess normalization. | <span style="border: 1px solid #ccc; padding: 2px 5px;">Close</span> |  |  |
|----------------------------------------------------------------------|--------------------------------------------------------------------------------------------------------------------------------------------------------------------------------------------------------------------------------------------------------------------------------------------------------------------------------------------------------------------------------------------------------------------------------------------------------------------------------------------------------------------------------------------------------------------------------------------------------------------------------------------------------------------------------------------------------------------------------------------------------------------------------------------------------------------------------------------------------------------------------------------------------------------------------------------------------------------------------------------------------------------------------------------------------------------------------------------------------------------------------------------------------------------------------------------------------------------------------------------------------------------------------------------------------------------------------------------------------------------------------------------------------------------------------------------------------------------------------------------------------------------------------------------------------------------------------------------------------------------------------------------------------------------------------------------------------------------------------------------------------------------------------------------------------------------------------------------------------------------------------------------------------------------------------------------------------------------------------------------------------------------------------------------------------------------------------------------------------------------------------------------------------------------------------------------------------------------------------------------------------------------------------------------------------------------------------------------------------------------------------------------------------------------------------------------------------------------------------------------------------------------------------------------------------------------------------------------------------------------------------------------------------------------------------------------------------------------------------------------------------------------------------|--------------------------------------------------------------------------------------------------------------------------------------------------------------------------------------------------------------------------------------------------------|-------|-------|------------------|-------------------------------------------|-------------------------------------------------------------------------------------|----------------------------------------------------------------------|--------------------------------------------------------------------------------------------------------------------------------------------------------------------------------------------------------------------------|-----------------------------------------------------------------------------------------------------|---------------------------|------------------------------------------------------------------------------------------------------------------------------------------------------------------------------------------------|------------------------------------------------------------------------------------------------------------------------------------------------------------------------------------------------------------------------------|----------------------------------------------------------------------|------|-----------------------------------------------------------------------------------------------------------------------------------------------------------------------------------------------------------------|-----------------------------------------------------|------|------------------------------------------------------------------------------------------------------------------------------------------------------------------------------------------------------------------------|------------------------------------------|------|--------------------------------------------------------------------------------------------------------------------------------------------------------------------------------------------------------------------------------------------------------|----------------------------------------------------------------------|--|--|-------|------|------------------------------------------------------------------------------------------------------------------------------------------------------------|---------------|------|------------------------------------------------------------------------------------------------|----------------------------------------------------------------------|--|--|
| Option                                                               | Value                                                                                                                                                                                                                                                                                                                                                                                                                                                                                                                                                                                                                                                                                                                                                                                                                                                                                                                                                                                                                                                                                                                                                                                                                                                                                                                                                                                                                                                                                                                                                                                                                                                                                                                                                                                                                                                                                                                                                                                                                                                                                                                                                                                                                                                                                                                                                                                                                                                                                                                                                                                                                                                                                                                                                                          | Note:                                                                                                                                                                                                                                                  |       |       |                  |                                           |                                                                                     |                                                                      |                                                                                                                                                                                                                          |                                                                                                     |                           |                                                                                                                                                                                                |                                                                                                                                                                                                                              |                                                                      |      |                                                                                                                                                                                                                 |                                                     |      |                                                                                                                                                                                                                        |                                          |      |                                                                                                                                                                                                                                                        |                                                                      |  |  |       |      |                                                                                                                                                            |               |      |                                                                                                |                                                                      |  |  |
| Statistical test                                                     | Unpaired parametric t-test (Welch t-test)                                                                                                                                                                                                                                                                                                                                                                                                                                                                                                                                                                                                                                                                                                                                                                                                                                                                                                                                                                                                                                                                                                                                                                                                                                                                                                                                                                                                                                                                                                                                                                                                                                                                                                                                                                                                                                                                                                                                                                                                                                                                                                                                                                                                                                                                                                                                                                                                                                                                                                                                                                                                                                                                                                                                      | Statistical test method: Welch t-test (unequal variances) or Wilcoxon Rank Sum test                                                                                                                                                                    |       |       |                  |                                           |                                                                                     |                                                                      |                                                                                                                                                                                                                          |                                                                                                     |                           |                                                                                                                                                                                                |                                                                                                                                                                                                                              |                                                                      |      |                                                                                                                                                                                                                 |                                                     |      |                                                                                                                                                                                                                        |                                          |      |                                                                                                                                                                                                                                                        |                                                                      |  |  |       |      |                                                                                                                                                            |               |      |                                                                                                |                                                                      |  |  |
| Perform paired test                                                  | <span style="background-color: #28a745; color: white; padding: 2px 5px;">VIEW PAIRS</span>                                                                                                                                                                                                                                                                                                                                                                                                                                                                                                                                                                                                                                                                                                                                                                                                                                                                                                                                                                                                                                                                                                                                                                                                                                                                                                                                                                                                                                                                                                                                                                                                                                                                                                                                                                                                                                                                                                                                                                                                                                                                                                                                                                                                                                                                                                                                                                                                                                                                                                                                                                                                                                                                                     | The selected statistical test is performed as a paired test. The sample pairs need to be specified.                                                                                                                                                    |       |       |                  |                                           |                                                                                     |                                                                      |                                                                                                                                                                                                                          |                                                                                                     |                           |                                                                                                                                                                                                |                                                                                                                                                                                                                              |                                                                      |      |                                                                                                                                                                                                                 |                                                     |      |                                                                                                                                                                                                                        |                                          |      |                                                                                                                                                                                                                                                        |                                                                      |  |  |       |      |                                                                                                                                                            |               |      |                                                                                                |                                                                      |  |  |
| Perform post-hoc analysis                                            | True                                                                                                                                                                                                                                                                                                                                                                                                                                                                                                                                                                                                                                                                                                                                                                                                                                                                                                                                                                                                                                                                                                                                                                                                                                                                                                                                                                                                                                                                                                                                                                                                                                                                                                                                                                                                                                                                                                                                                                                                                                                                                                                                                                                                                                                                                                                                                                                                                                                                                                                                                                                                                                                                                                                                                                           | Perform post-hoc analysis [multigroup only]                                                                                                                                                                                                            |       |       |                  |                                           |                                                                                     |                                                                      |                                                                                                                                                                                                                          |                                                                                                     |                           |                                                                                                                                                                                                |                                                                                                                                                                                                                              |                                                                      |      |                                                                                                                                                                                                                 |                                                     |      |                                                                                                                                                                                                                        |                                          |      |                                                                                                                                                                                                                                                        |                                                                      |  |  |       |      |                                                                                                                                                            |               |      |                                                                                                |                                                                      |  |  |
| p-value threshold (highly significant features)                      | 0.01                                                                                                                                                                                                                                                                                                                                                                                                                                                                                                                                                                                                                                                                                                                                                                                                                                                                                                                                                                                                                                                                                                                                                                                                                                                                                                                                                                                                                                                                                                                                                                                                                                                                                                                                                                                                                                                                                                                                                                                                                                                                                                                                                                                                                                                                                                                                                                                                                                                                                                                                                                                                                                                                                                                                                                           | Features with a p-value less than this threshold are considered highly significant. Some statistical figures (e.g. Mirror plot) are generated using only the dysregulated features according to this threshold.                                        |       |       |                  |                                           |                                                                                     |                                                                      |                                                                                                                                                                                                                          |                                                                                                     |                           |                                                                                                                                                                                                |                                                                                                                                                                                                                              |                                                                      |      |                                                                                                                                                                                                                 |                                                     |      |                                                                                                                                                                                                                        |                                          |      |                                                                                                                                                                                                                                                        |                                                                      |  |  |       |      |                                                                                                                                                            |               |      |                                                                                                |                                                                      |  |  |
| fold change threshold (highly significant features)                  | 1.5                                                                                                                                                                                                                                                                                                                                                                                                                                                                                                                                                                                                                                                                                                                                                                                                                                                                                                                                                                                                                                                                                                                                                                                                                                                                                                                                                                                                                                                                                                                                                                                                                                                                                                                                                                                                                                                                                                                                                                                                                                                                                                                                                                                                                                                                                                                                                                                                                                                                                                                                                                                                                                                                                                                                                                            | Features with a fold change greater than this threshold are considered highly significant. Some statistical figures (e.g. Mirror plot) are generated using only the dysregulated features according to this threshold.                                 |       |       |                  |                                           |                                                                                     |                                                                      |                                                                                                                                                                                                                          |                                                                                                     |                           |                                                                                                                                                                                                |                                                                                                                                                                                                                              |                                                                      |      |                                                                                                                                                                                                                 |                                                     |      |                                                                                                                                                                                                                        |                                          |      |                                                                                                                                                                                                                                                        |                                                                      |  |  |       |      |                                                                                                                                                            |               |      |                                                                                                |                                                                      |  |  |
| p-value threshold (significant features)                             | 0.05                                                                                                                                                                                                                                                                                                                                                                                                                                                                                                                                                                                                                                                                                                                                                                                                                                                                                                                                                                                                                                                                                                                                                                                                                                                                                                                                                                                                                                                                                                                                                                                                                                                                                                                                                                                                                                                                                                                                                                                                                                                                                                                                                                                                                                                                                                                                                                                                                                                                                                                                                                                                                                                                                                                                                                           | Features with a p-value less than this threshold are not considered significant and are omitted from some calculations to save time and space. EIC's, annotations and database ID's are not generated for features with p-values above this threshold. |       |       |                  |                                           |                                                                                     |                                                                      |                                                                                                                                                                                                                          |                                                                                                     |                           |                                                                                                                                                                                                |                                                                                                                                                                                                                              |                                                                      |      |                                                                                                                                                                                                                 |                                                     |      |                                                                                                                                                                                                                        |                                          |      |                                                                                                                                                                                                                                                        |                                                                      |  |  |       |      |                                                                                                                                                            |               |      |                                                                                                |                                                                      |  |  |
| <a href="#">View Advanced Options</a>                                |                                                                                                                                                                                                                                                                                                                                                                                                                                                                                                                                                                                                                                                                                                                                                                                                                                                                                                                                                                                                                                                                                                                                                                                                                                                                                                                                                                                                                                                                                                                                                                                                                                                                                                                                                                                                                                                                                                                                                                                                                                                                                                                                                                                                                                                                                                                                                                                                                                                                                                                                                                                                                                                                                                                                                                                |                                                                                                                                                                                                                                                        |       |       |                  |                                           |                                                                                     |                                                                      |                                                                                                                                                                                                                          |                                                                                                     |                           |                                                                                                                                                                                                |                                                                                                                                                                                                                              |                                                                      |      |                                                                                                                                                                                                                 |                                                     |      |                                                                                                                                                                                                                        |                                          |      |                                                                                                                                                                                                                                                        |                                                                      |  |  |       |      |                                                                                                                                                            |               |      |                                                                                                |                                                                      |  |  |
| value                                                                | into                                                                                                                                                                                                                                                                                                                                                                                                                                                                                                                                                                                                                                                                                                                                                                                                                                                                                                                                                                                                                                                                                                                                                                                                                                                                                                                                                                                                                                                                                                                                                                                                                                                                                                                                                                                                                                                                                                                                                                                                                                                                                                                                                                                                                                                                                                                                                                                                                                                                                                                                                                                                                                                                                                                                                                           | intensity values to be used for the diffreport. If value="into", integrated peak intensities are used. If value="maxo", maximum peak intensities are used.                                                                                             |       |       |                  |                                           |                                                                                     |                                                                      |                                                                                                                                                                                                                          |                                                                                                     |                           |                                                                                                                                                                                                |                                                                                                                                                                                                                              |                                                                      |      |                                                                                                                                                                                                                 |                                                     |      |                                                                                                                                                                                                                        |                                          |      |                                                                                                                                                                                                                                                        |                                                                      |  |  |       |      |                                                                                                                                                            |               |      |                                                                                                |                                                                      |  |  |
| Normalization                                                        | None                                                                                                                                                                                                                                                                                                                                                                                                                                                                                                                                                                                                                                                                                                                                                                                                                                                                                                                                                                                                                                                                                                                                                                                                                                                                                                                                                                                                                                                                                                                                                                                                                                                                                                                                                                                                                                                                                                                                                                                                                                                                                                                                                                                                                                                                                                                                                                                                                                                                                                                                                                                                                                                                                                                                                                           | Normalize the intensity values by either probabilistic quotient or cyclic loess normalization.                                                                                                                                                         |       |       |                  |                                           |                                                                                     |                                                                      |                                                                                                                                                                                                                          |                                                                                                     |                           |                                                                                                                                                                                                |                                                                                                                                                                                                                              |                                                                      |      |                                                                                                                                                                                                                 |                                                     |      |                                                                                                                                                                                                                        |                                          |      |                                                                                                                                                                                                                                                        |                                                                      |  |  |       |      |                                                                                                                                                            |               |      |                                                                                                |                                                                      |  |  |
| <span style="border: 1px solid #ccc; padding: 2px 5px;">Close</span> |                                                                                                                                                                                                                                                                                                                                                                                                                                                                                                                                                                                                                                                                                                                                                                                                                                                                                                                                                                                                                                                                                                                                                                                                                                                                                                                                                                                                                                                                                                                                                                                                                                                                                                                                                                                                                                                                                                                                                                                                                                                                                                                                                                                                                                                                                                                                                                                                                                                                                                                                                                                                                                                                                                                                                                                |                                                                                                                                                                                                                                                        |       |       |                  |                                           |                                                                                     |                                                                      |                                                                                                                                                                                                                          |                                                                                                     |                           |                                                                                                                                                                                                |                                                                                                                                                                                                                              |                                                                      |      |                                                                                                                                                                                                                 |                                                     |      |                                                                                                                                                                                                                        |                                          |      |                                                                                                                                                                                                                                                        |                                                                      |  |  |       |      |                                                                                                                                                            |               |      |                                                                                                |                                                                      |  |  |
| 6                                                                    | <div style="display: flex; justify-content: space-between; border-bottom: 1px solid black; padding-bottom: 5px;"> <span>General</span> <span>Feature Detection</span> <span>Retention Time Correction</span> <span>Alignment</span> <span>Statistics</span> <span>Annotation</span> <span>Identification</span> <span>Visualization</span> <span>Miscellaneous</span> </div> <table style="width: 100%; border-collapse: collapse;"> <thead> <tr> <th style="width: 30%; text-align: left;">Option</th> <th style="width: 40%; text-align: left;">Value</th> <th style="width: 30%; text-align: left;">Note:</th> </tr> </thead> <tbody> <tr> <td>ppm</td> <td>15</td> <td>ppm error</td> </tr> <tr> <td>m/z absolute error</td> <td>0.015</td> <td>m/z absolute error</td> </tr> <tr> <td>Search for</td> <td>isotopes + adducts</td> <td>Search for 1.) just isotopic features or 2.) isotopic features and adducts formations, dimers, trimers, neutral losses, etc. WARNING: searching for all adducts can increase the total processing time by approximately 50 %</td> </tr> <tr> <td colspan="3" style="text-align: right;"><span style="border: 1px solid #ccc; padding: 2px 5px;">Close</span></td> </tr> </tbody> </table>                                                                                                                                                                                                                                                                                                                                                                                                                                                                                                                                                                                                                                                                                                                                                                                                                                                                                                                                                                                                                                                                                                                                                                                                                                                                                                                                                                                                                                                                                                                                           | Option                                                                                                                                                                                                                                                 | Value | Note: | ppm              | 15                                        | ppm error                                                                           | m/z absolute error                                                   | 0.015                                                                                                                                                                                                                    | m/z absolute error                                                                                  | Search for                | isotopes + adducts                                                                                                                                                                             | Search for 1.) just isotopic features or 2.) isotopic features and adducts formations, dimers, trimers, neutral losses, etc. WARNING: searching for all adducts can increase the total processing time by approximately 50 % | <span style="border: 1px solid #ccc; padding: 2px 5px;">Close</span> |      |                                                                                                                                                                                                                 |                                                     |      |                                                                                                                                                                                                                        |                                          |      |                                                                                                                                                                                                                                                        |                                                                      |  |  |       |      |                                                                                                                                                            |               |      |                                                                                                |                                                                      |  |  |
| Option                                                               | Value                                                                                                                                                                                                                                                                                                                                                                                                                                                                                                                                                                                                                                                                                                                                                                                                                                                                                                                                                                                                                                                                                                                                                                                                                                                                                                                                                                                                                                                                                                                                                                                                                                                                                                                                                                                                                                                                                                                                                                                                                                                                                                                                                                                                                                                                                                                                                                                                                                                                                                                                                                                                                                                                                                                                                                          | Note:                                                                                                                                                                                                                                                  |       |       |                  |                                           |                                                                                     |                                                                      |                                                                                                                                                                                                                          |                                                                                                     |                           |                                                                                                                                                                                                |                                                                                                                                                                                                                              |                                                                      |      |                                                                                                                                                                                                                 |                                                     |      |                                                                                                                                                                                                                        |                                          |      |                                                                                                                                                                                                                                                        |                                                                      |  |  |       |      |                                                                                                                                                            |               |      |                                                                                                |                                                                      |  |  |
| ppm                                                                  | 15                                                                                                                                                                                                                                                                                                                                                                                                                                                                                                                                                                                                                                                                                                                                                                                                                                                                                                                                                                                                                                                                                                                                                                                                                                                                                                                                                                                                                                                                                                                                                                                                                                                                                                                                                                                                                                                                                                                                                                                                                                                                                                                                                                                                                                                                                                                                                                                                                                                                                                                                                                                                                                                                                                                                                                             | ppm error                                                                                                                                                                                                                                              |       |       |                  |                                           |                                                                                     |                                                                      |                                                                                                                                                                                                                          |                                                                                                     |                           |                                                                                                                                                                                                |                                                                                                                                                                                                                              |                                                                      |      |                                                                                                                                                                                                                 |                                                     |      |                                                                                                                                                                                                                        |                                          |      |                                                                                                                                                                                                                                                        |                                                                      |  |  |       |      |                                                                                                                                                            |               |      |                                                                                                |                                                                      |  |  |
| m/z absolute error                                                   | 0.015                                                                                                                                                                                                                                                                                                                                                                                                                                                                                                                                                                                                                                                                                                                                                                                                                                                                                                                                                                                                                                                                                                                                                                                                                                                                                                                                                                                                                                                                                                                                                                                                                                                                                                                                                                                                                                                                                                                                                                                                                                                                                                                                                                                                                                                                                                                                                                                                                                                                                                                                                                                                                                                                                                                                                                          | m/z absolute error                                                                                                                                                                                                                                     |       |       |                  |                                           |                                                                                     |                                                                      |                                                                                                                                                                                                                          |                                                                                                     |                           |                                                                                                                                                                                                |                                                                                                                                                                                                                              |                                                                      |      |                                                                                                                                                                                                                 |                                                     |      |                                                                                                                                                                                                                        |                                          |      |                                                                                                                                                                                                                                                        |                                                                      |  |  |       |      |                                                                                                                                                            |               |      |                                                                                                |                                                                      |  |  |
| Search for                                                           | isotopes + adducts                                                                                                                                                                                                                                                                                                                                                                                                                                                                                                                                                                                                                                                                                                                                                                                                                                                                                                                                                                                                                                                                                                                                                                                                                                                                                                                                                                                                                                                                                                                                                                                                                                                                                                                                                                                                                                                                                                                                                                                                                                                                                                                                                                                                                                                                                                                                                                                                                                                                                                                                                                                                                                                                                                                                                             | Search for 1.) just isotopic features or 2.) isotopic features and adducts formations, dimers, trimers, neutral losses, etc. WARNING: searching for all adducts can increase the total processing time by approximately 50 %                           |       |       |                  |                                           |                                                                                     |                                                                      |                                                                                                                                                                                                                          |                                                                                                     |                           |                                                                                                                                                                                                |                                                                                                                                                                                                                              |                                                                      |      |                                                                                                                                                                                                                 |                                                     |      |                                                                                                                                                                                                                        |                                          |      |                                                                                                                                                                                                                                                        |                                                                      |  |  |       |      |                                                                                                                                                            |               |      |                                                                                                |                                                                      |  |  |
| <span style="border: 1px solid #ccc; padding: 2px 5px;">Close</span> |                                                                                                                                                                                                                                                                                                                                                                                                                                                                                                                                                                                                                                                                                                                                                                                                                                                                                                                                                                                                                                                                                                                                                                                                                                                                                                                                                                                                                                                                                                                                                                                                                                                                                                                                                                                                                                                                                                                                                                                                                                                                                                                                                                                                                                                                                                                                                                                                                                                                                                                                                                                                                                                                                                                                                                                |                                                                                                                                                                                                                                                        |       |       |                  |                                           |                                                                                     |                                                                      |                                                                                                                                                                                                                          |                                                                                                     |                           |                                                                                                                                                                                                |                                                                                                                                                                                                                              |                                                                      |      |                                                                                                                                                                                                                 |                                                     |      |                                                                                                                                                                                                                        |                                          |      |                                                                                                                                                                                                                                                        |                                                                      |  |  |       |      |                                                                                                                                                            |               |      |                                                                                                |                                                                      |  |  |
| 7                                                                    | <div style="display: flex; justify-content: space-between; border-bottom: 1px solid black; padding-bottom: 5px;"> <span>General</span> <span>Feature Detection</span> <span>Retention Time Correction</span> <span>Alignment</span> <span>Statistics</span> <span>Annotation</span> <span>Identification</span> <span>Visualization</span> <span>Miscellaneous</span> </div> <table style="width: 100%; border-collapse: collapse;"> <thead> <tr> <th style="width: 30%; text-align: left;">Option</th> <th style="width: 40%; text-align: left;">Value</th> <th style="width: 30%; text-align: left;">Note:</th> </tr> </thead> <tbody> <tr> <td>ppm</td> <td>10</td> <td>tolerance for database search</td> </tr> <tr> <td>adducts</td> <td> <div style="border: 1px solid #ccc; padding: 2px; margin-bottom: 5px;"> [M-H]-<br/> [M-H2O-H]-<br/> [M+Na-2H]-<br/> [M+C]-<br/> [M+K-2H]-<br/> [M+FA-H]-<br/> [M-2H]2-<br/> [M-3H]3-<br/> [M+CH3COO]-<br/> [M+F]- </div> </td> <td>adducts to be considered for database search</td> </tr> <tr> <td>sample biosource</td> <td><span style="background-color: #28a745; color: white; padding: 2px 5px;">SELECT BIOSOURCE</span> <span style="border: 1px solid #ccc; padding: 2px 5px;">set default</span><br/>SELECTED: ECOLI</td> <td>Select your species/cell line, etc. that correspond to your samples. Default human.</td> </tr> <tr> <td>pathway ppm deviation</td> <td>20</td> <td>metabolite pathway lookup</td> </tr> <tr> <td>input intensity threshold</td> <td>5000</td> <td>minimum intensity cut-off for pathway analysis</td> </tr> <tr> <td>significant list p-value cutoff</td> <td>AUTO</td> <td>significant list p-value cut-off</td> </tr> <tr> <td colspan="3" style="text-align: right;"><span style="border: 1px solid #ccc; padding: 2px 5px;">Close</span></td> </tr> </tbody> </table>                                                                                                                                                                                                                                                                                                                                                                                                                                                                                                                                                                                                                                                                                                                                                                                                                                                                                                                | Option                                                                                                                                                                                                                                                 | Value | Note: | ppm              | 10                                        | tolerance for database search                                                       | adducts                                                              | <div style="border: 1px solid #ccc; padding: 2px; margin-bottom: 5px;"> [M-H]-<br/> [M-H2O-H]-<br/> [M+Na-2H]-<br/> [M+C]-<br/> [M+K-2H]-<br/> [M+FA-H]-<br/> [M-2H]2-<br/> [M-3H]3-<br/> [M+CH3COO]-<br/> [M+F]- </div> | adducts to be considered for database search                                                        | sample biosource          | <span style="background-color: #28a745; color: white; padding: 2px 5px;">SELECT BIOSOURCE</span> <span style="border: 1px solid #ccc; padding: 2px 5px;">set default</span><br>SELECTED: ECOLI | Select your species/cell line, etc. that correspond to your samples. Default human.                                                                                                                                          | pathway ppm deviation                                                | 20   | metabolite pathway lookup                                                                                                                                                                                       | input intensity threshold                           | 5000 | minimum intensity cut-off for pathway analysis                                                                                                                                                                         | significant list p-value cutoff          | AUTO | significant list p-value cut-off                                                                                                                                                                                                                       | <span style="border: 1px solid #ccc; padding: 2px 5px;">Close</span> |  |  |       |      |                                                                                                                                                            |               |      |                                                                                                |                                                                      |  |  |
| Option                                                               | Value                                                                                                                                                                                                                                                                                                                                                                                                                                                                                                                                                                                                                                                                                                                                                                                                                                                                                                                                                                                                                                                                                                                                                                                                                                                                                                                                                                                                                                                                                                                                                                                                                                                                                                                                                                                                                                                                                                                                                                                                                                                                                                                                                                                                                                                                                                                                                                                                                                                                                                                                                                                                                                                                                                                                                                          | Note:                                                                                                                                                                                                                                                  |       |       |                  |                                           |                                                                                     |                                                                      |                                                                                                                                                                                                                          |                                                                                                     |                           |                                                                                                                                                                                                |                                                                                                                                                                                                                              |                                                                      |      |                                                                                                                                                                                                                 |                                                     |      |                                                                                                                                                                                                                        |                                          |      |                                                                                                                                                                                                                                                        |                                                                      |  |  |       |      |                                                                                                                                                            |               |      |                                                                                                |                                                                      |  |  |
| ppm                                                                  | 10                                                                                                                                                                                                                                                                                                                                                                                                                                                                                                                                                                                                                                                                                                                                                                                                                                                                                                                                                                                                                                                                                                                                                                                                                                                                                                                                                                                                                                                                                                                                                                                                                                                                                                                                                                                                                                                                                                                                                                                                                                                                                                                                                                                                                                                                                                                                                                                                                                                                                                                                                                                                                                                                                                                                                                             | tolerance for database search                                                                                                                                                                                                                          |       |       |                  |                                           |                                                                                     |                                                                      |                                                                                                                                                                                                                          |                                                                                                     |                           |                                                                                                                                                                                                |                                                                                                                                                                                                                              |                                                                      |      |                                                                                                                                                                                                                 |                                                     |      |                                                                                                                                                                                                                        |                                          |      |                                                                                                                                                                                                                                                        |                                                                      |  |  |       |      |                                                                                                                                                            |               |      |                                                                                                |                                                                      |  |  |
| adducts                                                              | <div style="border: 1px solid #ccc; padding: 2px; margin-bottom: 5px;"> [M-H]-<br/> [M-H2O-H]-<br/> [M+Na-2H]-<br/> [M+C]-<br/> [M+K-2H]-<br/> [M+FA-H]-<br/> [M-2H]2-<br/> [M-3H]3-<br/> [M+CH3COO]-<br/> [M+F]- </div>                                                                                                                                                                                                                                                                                                                                                                                                                                                                                                                                                                                                                                                                                                                                                                                                                                                                                                                                                                                                                                                                                                                                                                                                                                                                                                                                                                                                                                                                                                                                                                                                                                                                                                                                                                                                                                                                                                                                                                                                                                                                                                                                                                                                                                                                                                                                                                                                                                                                                                                                                       | adducts to be considered for database search                                                                                                                                                                                                           |       |       |                  |                                           |                                                                                     |                                                                      |                                                                                                                                                                                                                          |                                                                                                     |                           |                                                                                                                                                                                                |                                                                                                                                                                                                                              |                                                                      |      |                                                                                                                                                                                                                 |                                                     |      |                                                                                                                                                                                                                        |                                          |      |                                                                                                                                                                                                                                                        |                                                                      |  |  |       |      |                                                                                                                                                            |               |      |                                                                                                |                                                                      |  |  |
| sample biosource                                                     | <span style="background-color: #28a745; color: white; padding: 2px 5px;">SELECT BIOSOURCE</span> <span style="border: 1px solid #ccc; padding: 2px 5px;">set default</span><br>SELECTED: ECOLI                                                                                                                                                                                                                                                                                                                                                                                                                                                                                                                                                                                                                                                                                                                                                                                                                                                                                                                                                                                                                                                                                                                                                                                                                                                                                                                                                                                                                                                                                                                                                                                                                                                                                                                                                                                                                                                                                                                                                                                                                                                                                                                                                                                                                                                                                                                                                                                                                                                                                                                                                                                 | Select your species/cell line, etc. that correspond to your samples. Default human.                                                                                                                                                                    |       |       |                  |                                           |                                                                                     |                                                                      |                                                                                                                                                                                                                          |                                                                                                     |                           |                                                                                                                                                                                                |                                                                                                                                                                                                                              |                                                                      |      |                                                                                                                                                                                                                 |                                                     |      |                                                                                                                                                                                                                        |                                          |      |                                                                                                                                                                                                                                                        |                                                                      |  |  |       |      |                                                                                                                                                            |               |      |                                                                                                |                                                                      |  |  |
| pathway ppm deviation                                                | 20                                                                                                                                                                                                                                                                                                                                                                                                                                                                                                                                                                                                                                                                                                                                                                                                                                                                                                                                                                                                                                                                                                                                                                                                                                                                                                                                                                                                                                                                                                                                                                                                                                                                                                                                                                                                                                                                                                                                                                                                                                                                                                                                                                                                                                                                                                                                                                                                                                                                                                                                                                                                                                                                                                                                                                             | metabolite pathway lookup                                                                                                                                                                                                                              |       |       |                  |                                           |                                                                                     |                                                                      |                                                                                                                                                                                                                          |                                                                                                     |                           |                                                                                                                                                                                                |                                                                                                                                                                                                                              |                                                                      |      |                                                                                                                                                                                                                 |                                                     |      |                                                                                                                                                                                                                        |                                          |      |                                                                                                                                                                                                                                                        |                                                                      |  |  |       |      |                                                                                                                                                            |               |      |                                                                                                |                                                                      |  |  |
| input intensity threshold                                            | 5000                                                                                                                                                                                                                                                                                                                                                                                                                                                                                                                                                                                                                                                                                                                                                                                                                                                                                                                                                                                                                                                                                                                                                                                                                                                                                                                                                                                                                                                                                                                                                                                                                                                                                                                                                                                                                                                                                                                                                                                                                                                                                                                                                                                                                                                                                                                                                                                                                                                                                                                                                                                                                                                                                                                                                                           | minimum intensity cut-off for pathway analysis                                                                                                                                                                                                         |       |       |                  |                                           |                                                                                     |                                                                      |                                                                                                                                                                                                                          |                                                                                                     |                           |                                                                                                                                                                                                |                                                                                                                                                                                                                              |                                                                      |      |                                                                                                                                                                                                                 |                                                     |      |                                                                                                                                                                                                                        |                                          |      |                                                                                                                                                                                                                                                        |                                                                      |  |  |       |      |                                                                                                                                                            |               |      |                                                                                                |                                                                      |  |  |
| significant list p-value cutoff                                      | AUTO                                                                                                                                                                                                                                                                                                                                                                                                                                                                                                                                                                                                                                                                                                                                                                                                                                                                                                                                                                                                                                                                                                                                                                                                                                                                                                                                                                                                                                                                                                                                                                                                                                                                                                                                                                                                                                                                                                                                                                                                                                                                                                                                                                                                                                                                                                                                                                                                                                                                                                                                                                                                                                                                                                                                                                           | significant list p-value cut-off                                                                                                                                                                                                                       |       |       |                  |                                           |                                                                                     |                                                                      |                                                                                                                                                                                                                          |                                                                                                     |                           |                                                                                                                                                                                                |                                                                                                                                                                                                                              |                                                                      |      |                                                                                                                                                                                                                 |                                                     |      |                                                                                                                                                                                                                        |                                          |      |                                                                                                                                                                                                                                                        |                                                                      |  |  |       |      |                                                                                                                                                            |               |      |                                                                                                |                                                                      |  |  |
| <span style="border: 1px solid #ccc; padding: 2px 5px;">Close</span> |                                                                                                                                                                                                                                                                                                                                                                                                                                                                                                                                                                                                                                                                                                                                                                                                                                                                                                                                                                                                                                                                                                                                                                                                                                                                                                                                                                                                                                                                                                                                                                                                                                                                                                                                                                                                                                                                                                                                                                                                                                                                                                                                                                                                                                                                                                                                                                                                                                                                                                                                                                                                                                                                                                                                                                                |                                                                                                                                                                                                                                                        |       |       |                  |                                           |                                                                                     |                                                                      |                                                                                                                                                                                                                          |                                                                                                     |                           |                                                                                                                                                                                                |                                                                                                                                                                                                                              |                                                                      |      |                                                                                                                                                                                                                 |                                                     |      |                                                                                                                                                                                                                        |                                          |      |                                                                                                                                                                                                                                                        |                                                                      |  |  |       |      |                                                                                                                                                            |               |      |                                                                                                |                                                                      |  |  |
| 8                                                                    | <div style="display: flex; justify-content: space-between; border-bottom: 1px solid black; padding-bottom: 5px;"> <span>General</span> <span>Feature Detection</span> <span>Retention Time Correction</span> <span>Alignment</span> <span>Statistics</span> <span>Annotation</span> <span>Identification</span> <span>Visualization</span> <span>Miscellaneous</span> </div> <table style="width: 100%; border-collapse: collapse;"> <thead> <tr> <th style="width: 30%; text-align: left;">Option</th> <th style="width: 40%; text-align: left;">Value</th> <th style="width: 30%; text-align: left;">Note:</th> </tr> </thead> <tbody> <tr> <td>EIC width</td> <td>200</td> <td>Default width for extracted ion chromatograms in seconds</td> </tr> <tr> <td colspan="3" style="text-align: right;"><span style="border: 1px solid #ccc; padding: 2px 5px;">Close</span></td> </tr> </tbody> </table>                                                                                                                                                                                                                                                                                                                                                                                                                                                                                                                                                                                                                                                                                                                                                                                                                                                                                                                                                                                                                                                                                                                                                                                                                                                                                                                                                                                                                                                                                                                                                                                                                                                                                                                                                                                                                                                                        | Option                                                                                                                                                                                                                                                 | Value | Note: | EIC width        | 200                                       | Default width for extracted ion chromatograms in seconds                            | <span style="border: 1px solid #ccc; padding: 2px 5px;">Close</span> |                                                                                                                                                                                                                          |                                                                                                     |                           |                                                                                                                                                                                                |                                                                                                                                                                                                                              |                                                                      |      |                                                                                                                                                                                                                 |                                                     |      |                                                                                                                                                                                                                        |                                          |      |                                                                                                                                                                                                                                                        |                                                                      |  |  |       |      |                                                                                                                                                            |               |      |                                                                                                |                                                                      |  |  |
| Option                                                               | Value                                                                                                                                                                                                                                                                                                                                                                                                                                                                                                                                                                                                                                                                                                                                                                                                                                                                                                                                                                                                                                                                                                                                                                                                                                                                                                                                                                                                                                                                                                                                                                                                                                                                                                                                                                                                                                                                                                                                                                                                                                                                                                                                                                                                                                                                                                                                                                                                                                                                                                                                                                                                                                                                                                                                                                          | Note:                                                                                                                                                                                                                                                  |       |       |                  |                                           |                                                                                     |                                                                      |                                                                                                                                                                                                                          |                                                                                                     |                           |                                                                                                                                                                                                |                                                                                                                                                                                                                              |                                                                      |      |                                                                                                                                                                                                                 |                                                     |      |                                                                                                                                                                                                                        |                                          |      |                                                                                                                                                                                                                                                        |                                                                      |  |  |       |      |                                                                                                                                                            |               |      |                                                                                                |                                                                      |  |  |
| EIC width                                                            | 200                                                                                                                                                                                                                                                                                                                                                                                                                                                                                                                                                                                                                                                                                                                                                                                                                                                                                                                                                                                                                                                                                                                                                                                                                                                                                                                                                                                                                                                                                                                                                                                                                                                                                                                                                                                                                                                                                                                                                                                                                                                                                                                                                                                                                                                                                                                                                                                                                                                                                                                                                                                                                                                                                                                                                                            | Default width for extracted ion chromatograms in seconds                                                                                                                                                                                               |       |       |                  |                                           |                                                                                     |                                                                      |                                                                                                                                                                                                                          |                                                                                                     |                           |                                                                                                                                                                                                |                                                                                                                                                                                                                              |                                                                      |      |                                                                                                                                                                                                                 |                                                     |      |                                                                                                                                                                                                                        |                                          |      |                                                                                                                                                                                                                                                        |                                                                      |  |  |       |      |                                                                                                                                                            |               |      |                                                                                                |                                                                      |  |  |
| <span style="border: 1px solid #ccc; padding: 2px 5px;">Close</span> |                                                                                                                                                                                                                                                                                                                                                                                                                                                                                                                                                                                                                                                                                                                                                                                                                                                                                                                                                                                                                                                                                                                                                                                                                                                                                                                                                                                                                                                                                                                                                                                                                                                                                                                                                                                                                                                                                                                                                                                                                                                                                                                                                                                                                                                                                                                                                                                                                                                                                                                                                                                                                                                                                                                                                                                |                                                                                                                                                                                                                                                        |       |       |                  |                                           |                                                                                     |                                                                      |                                                                                                                                                                                                                          |                                                                                                     |                           |                                                                                                                                                                                                |                                                                                                                                                                                                                              |                                                                      |      |                                                                                                                                                                                                                 |                                                     |      |                                                                                                                                                                                                                        |                                          |      |                                                                                                                                                                                                                                                        |                                                                      |  |  |       |      |                                                                                                                                                            |               |      |                                                                                                |                                                                      |  |  |

9

General Feature Detection Retention Time Correction Alignment Statistics Annotation Identification Visualization Miscellaneous

**Option** **Value** **Note:**

Correct mass calibration gaps  Correction of mass calibration gaps - subtract LockMass scans from data. Only applicable for Waters instruments!

Bypass file sanity check  All uploaded files are normally checked for different types of errors and inconsistencies. This option disables the file sanity check. Unfortunately necessary for certain types of GC/MS data when used with centWave. Only disable this check if you know what you are doing!

Close

---

10

JOB ID: 1172567

JOB NAME: Ecoli\_glucose-vs-adenosine

FILES UPLOADED: [↑ UPLOAD LIST](#)

| FileID | Filename   | Upload Date         | List Type | Accession ID | Metabolic Matches | Remove |
|--------|------------|---------------------|-----------|--------------|-------------------|--------|
| 477577 | Ecoli_gene | 2017-08-10 05:35:00 | Genes     | Gene symbol  | View              | ✖      |
| 477578 | Ecoli_prot | 2017-08-10 05:35:53 | Proteins  | Gene symbol  | View              | ✖      |

Run matching subjobs

1. Du, Z., Nandakumar, R., Nickerson, K.W. & Li, X. Proteomic adaptations to starvation prepare *Escherichia coli* for disinfection tolerance. *Water Res.* **69**, 110-119 (2015).
2. Vijayendran, C., Burgemeister, S., Friehs, K., Niehaus, K. & Flaschel, E. 2DBase: 2D-PAGE database of *Escherichia coli*. *Biochemical and Biophysical Research Communications* **363**, 822-827 (2007).
3. Vijayendran, C. et al. The plasticity of global proteome and genome expression analyzed in closely related W3110 and MG1655 strains of a well-studied model organism, *Escherichia coli*-K12. *J. Biotechnol.* **128**, 747-761 (2007).
